# Supplementary material for: Multiphoton microscopy providing pathological-level quantification of myocardial fibrosis in transplanted human heart
Source: Springer Nature journal article supplement (doi:10.1007/s10103-022-03557-5), 2022-04-08
Supplement: MOESM1 [file 20297028]

## Multiphoton microscopy providing pathological-level quantification of myocardial fibrosis in transplanted human heart

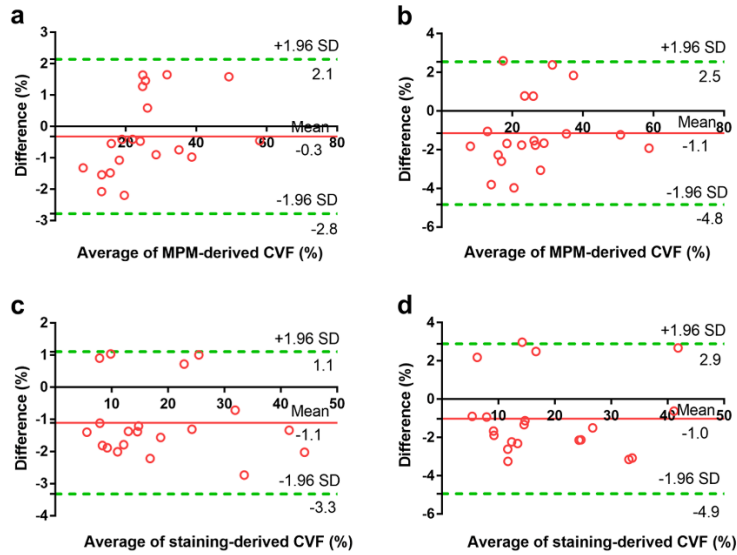

**Supplemental Figure.** Reproducibility of CVF in two measurement modalities. Bland-Altman shows inter- and intra-observer reproducibility of MPM-derived CVF (**a and b**) and staining-derived CVF (**c and d**)

CVF, collagen volume fraction; MPM, multiphoton microscopy
